# Supplementary material for: Discovery of Bacterial Key Genes from 16S rRNA-Seq Profiles That Are Associated with the Complications of SARS-CoV-2 Infections and Provide Therapeutic Indications
Source: MDPI journal article supplement (doi:10.3390/ph17040432), 2024-03-28
Supplement: s1 [file s1]

**Topic: Discovery of bacterial key genes from 16s rRNA-seq profiles that are associated with the complications of SARS-CoV-2 infections and provide therapeutic indications**

**(Supplementary File)**

| <b>Tables/Figures</b> | <b>Contents</b>                                                                                                                                                                                                                                                                                                                                                                   | <b>Pages</b> |
|-----------------------|-----------------------------------------------------------------------------------------------------------------------------------------------------------------------------------------------------------------------------------------------------------------------------------------------------------------------------------------------------------------------------------|--------------|
| <b>Table S1</b>       | Comparison of different alpha diversity indices of microbial communities with a significant difference between COVID-19 patients (n=221) and healthy subjects (n=76) based on Wilcoxon-Mann-Whitney test p values.                                                                                                                                                                | 2            |
| <b>Table S2</b>       | Comparative relative abundances of the oral and gut microbiota's at the phylum, and genus level in COVID-19 and healthy group. Firmicutes, Bacteroidetes, Proteobacteria and Fusobacteria were the most abundant phyla between two group whereas Bacteroides, Prevotella, Actinomyces, Rothia and Fusobacterium were the most dominated genera's in the microbiome of the sample. | 2-3          |
| <b>Table S3</b>       | Pharmacological assesment of the top three potential liggand molecules derived from the admetSAR , SwissADME, and pKCSM web-servers.                                                                                                                                                                                                                                              | 3-4          |
| <b>Table S4</b>       | Metadata of SARS-CoV-2 infections obtained by reviewing published articles were used in this study                                                                                                                                                                                                                                                                                | 4-15         |
| <b>Table S5</b>       | Binding affinity score of two FDA-Approved drug corresponding to our proposed and published reviewed targets.                                                                                                                                                                                                                                                                     | 16           |
| <b>Table S6</b>       | Non-bond interactions between top-ordered three receptors and ligand compounds based on their binding affinity.                                                                                                                                                                                                                                                                   | 16-18        |
| <b>Figure S1</b>      | A workflow of exploring potential functional genes and their metabolic pathways from differentially abundant bacterial genus between SARS-CoV-2 infection and control samples.                                                                                                                                                                                                    | 18           |
| <b>Reference</b>      |                                                                                                                                                                                                                                                                                                                                                                                   | 19-25        |

**Table S1:** Comparison of different alpha diversity indices of microbial communities with a significant difference between COVID-19 patients (n=221) and healthy subjects (n=76) based on Wilcoxon-Mann-Whitney test p values.

| Alpha Diversity | Disease Status | Wilcoxon-Mann-Whitney test     |               | Cliff's Delta        |                  |
|-----------------|----------------|--------------------------------|---------------|----------------------|------------------|
|                 |                | Median (IQR)                   | P-value (FDR) | Mean (SD)            | Effect size      |
| Observed        | Patients       | 937.5<br>(717.25, 1199.75)     | 2.2e-16       | 3105.36<br>(825.81)  | 0.983<br>(large) |
|                 | Healthy        | 2941.5<br>(2502, 3874)         |               | 1003.21<br>(431.24)  |                  |
| Chao1           | Patients       | 1729.328<br>(1303.84, 2200.93) | 2.2e-16       | 5128.32<br>(1222.61) | 0.987<br>(large) |
|                 | Healthy        | 4852.912<br>(4250.33, 6318.36) |               | 1807.16<br>(688.06)  |                  |
| Shannon         | Patients       | 4.145<br>(3.605, 4.556)        | 3.442e-15     | 4.84<br>(0.612)      | 0.606<br>(large) |
|                 | Healthy        | 4.875<br>(4.455, 5.263)        |               | 4.00<br>(0.795)      |                  |
| Simpson         | Patients       | 0.953<br>(0.919, 0.971)        | 3.453e-05     | 0.962<br>(0.023)     | 0.319<br>(small) |
|                 | Healthy        | 0.969<br>(0.954, 0.977)        |               | 0.942<br>(0.038)     |                  |

**Table S2:** Comparative relative abundances of the oral and gut microbiota's at the phylum, and genus level in COVID-19 and healthy group. Firmicutes, Bacteroidetes, Proteobacteria and Fusobacteria were the most abundant phyla between two group whereas Bacteroides, Prevotella, Actinomyces, Rothia and Fusobacterium were the most dominated genera's in the microbiome of the sample.

| Taxonomic Rank | COVID-19 Patients |              |  | Healthy |           | Chi-square | P-value  |
|----------------|-------------------|--------------|--|---------|-----------|------------|----------|
|                | Median            | IQR          |  | Median  | IQR       |            |          |
| Phylum         |                   |              |  |         |           |            |          |
| Bacteroidetes  | 466               | 313.25-602.5 |  | 255     | 117-418   | 44.223     | 2.93e-11 |
| Thermi         | 0.00              | 0.00-0.00    |  | 0.00    | 0.00-0.00 | 10.167     | 0.001    |
| SR1            | 0.00              | 0.00-1.00    |  | 0.00    | 0.00-0.00 | 1.7739     | 0.182    |
| TM7            | 0.00              | 0.00-0.00    |  | 1.0     | 0.0-10.0  | 49.122     | 2.405e-  |

|                  |             |              |  |      |             |        |                  |
|------------------|-------------|--------------|--|------|-------------|--------|------------------|
|                  |             |              |  |      |             |        | <b>12</b>        |
| Actinobacteria   | 51.5        | 11-150.25    |  | 31.0 | 7.75-76.5   | 4.272  | <b>0.038</b>     |
| Proteobacteria   | 13          | 4.0-31.75    |  | 123  | 43.25-217   | 96.193 | <b>2.2e-16</b>   |
| Verrucomicrobia  | 0.00        | 0.00-0.00    |  | 0.00 | 0.00-0.00   | 16.752 | <b>4.26e-05</b>  |
| Cyanobacteria    | 0.00        | 0.0-1.0      |  | 0.00 | 0.0-2.0     | 11.43  | <b>0.0007</b>    |
| Firmicutes       | 61          | 36.25-144.75 |  | 286  | 217-377.5   | 72.77  | <b>2.2e-16</b>   |
| Fusobacteria     | 63          | 5.25 -132.5  |  | 43   | 16-85       | 4.913  | <b>0.026</b>     |
| <b>Genus</b>     |             |              |  |      |             |        |                  |
| Porphyromonas    | 0.50        | 0.00-13.75   |  | 1.5  | 0.00-11.25  | 0.173  | 0.677            |
| Bacteroides      | 47.50       | 13.0-224.75  |  | 24   | 6.75 -211.5 | 1.018  | 0.312            |
| Prevotella       | <b>165</b>  | 7.25 -375.5  |  | 64.5 | 22-177.25   | 12.89  | <b>0.000</b>     |
| Campylobacter    | 10.0        | 2.0-28.0     |  | 0.00 | 0.00-22.25  | 39.683 | <b>2.987e-10</b> |
| Streptomyces     | 0.00        | 0.00-0.00    |  | 0.00 | 0.00-0.00   | 0.699  | 0.402            |
| Bifidobacterium  | 0.00        | 0.00-1.00    |  | 0.00 | 0.00-2.0    | 1.781  | 0.181            |
| Actinomyces      | 8.50        | 4.00-26.5    |  | 2.50 | 0.00-16.25  | 8.753  | <b>0.003</b>     |
| Rothia           | 4.00        | 0.00-23.75   |  | 2.00 | 0.00-8.0    | 6.856  | <b>0.008</b>     |
| Corynebacterium  | <b>1.00</b> | 0.0-10.0     |  | 2.00 | 0.00-22.25  | 3.375  | <b>0.066</b>     |
| Faecalibacterium | 0.00        | 0.00-3.0     |  | 1.00 | 0.00-38.5   | 5.729  | <b>0.016</b>     |
| Fusobacterium    | 5.00        | 0.0-30.0     |  | 8.50 | 0.00-46.25  | 0.574  | 0.448            |
| Clostridium      | 0.00        | 0.00-0.00    |  | 0.00 | 0.00-0.00   | 6.331  | <b>0.011</b>     |

Values are median (IQR) of percentage relative abundance means.

**\*Kruskal-Wallis H test. P < 0.05 in bold.**

**Table S3:** Pharmacological assesment of the top three potential liggand molecules derived from the admetSAR , SwissADME, and pKCSM web-servers.

| Parameter                | Bemcentinib | Ledipasvir | Velpatasvir |
|--------------------------|-------------|------------|-------------|
| Molecular weight (g/mol) | 506.64      | 889.02     | 883.02      |
| H-Bond Acceptor          | 8           | 8          | 9           |
| H-Bond Donor             | 2           | 4          | 4           |
| CNS                      | -2.04       | -2.995     | -3.597      |
| CYP2D6 substrate         | No          | No         | No          |
| CYP3A4 substrate         | Yes         | Yes        | Yes         |

| Parameter                | Bemcentinib      | Ledipasvir       | Velpatasvir      |
|--------------------------|------------------|------------------|------------------|
| CYP1A2 inhibitor         | No               | Yes              | No               |
| CYP2C19 inhibitor        | Yes              | No               | No               |
| CYP2C9 inhibitor         | Yes              | No               | No               |
| CYP2D6 inhibitor         | No               | No               | No               |
| CYP3A4 inhibitor         | Yes              | No               | Yes              |
| Carcinogenicity          | Non-carcinogenic | Non-carcinogenic | Non-carcinogenic |
| Hepatotoxicity           | No               | No               | No               |
| P-glycoprotein inhibitor | No               | No               | No               |
| Acute Oral Toxicity      | No               | No               | No               |

**Table S4:** Metadata of SARS-CoV-2 infections obtained by reviewing published articles were used in this study

| Publication                   | Target                                                                        | Candidate drugs                                                                                                                                                                                                                                                                                                                                                                                                                                |
|-------------------------------|-------------------------------------------------------------------------------|------------------------------------------------------------------------------------------------------------------------------------------------------------------------------------------------------------------------------------------------------------------------------------------------------------------------------------------------------------------------------------------------------------------------------------------------|
| Rodrigues, L., et al. 2022[1] | S, E, N, M, NSP1, NSP2, NSP3, NSP4, NSP5, NSP6, NSP7, NSP8, NSP9, NSP10, ACE2 | Chloroquine, Hydroxychloroquine, Alpha-1-proteinase inhibitor, Aluminium, Aluminium acetate, Aluminium phosphate, Aprotinin, Cyproterone acetate, Filgrastim, Mifepristone, Pegfilgrastim                                                                                                                                                                                                                                                      |
| Siminea, N. et al. 2022[2]    | ACTB, AKT1, ATM, ATP6AP1, CSNK2A1, CDK2, EGF, MAPK14, MTOR and TP53           | Bosutinib, brigatinib, dasatinib, imatinib, nilotinib, ponatinib, regorafenib, Dabrafenib, encorafenib, regorafenib, ripretinib, sorafenib, vemurafenib, Bosutinib, Afatinib, brigatinib, dacomitinib, erlotinib, gefitinib, icotinib, lapatinib, neratinib, olmutinib, osimertinib, vandetanib, zanubrutinib, Brigatinib, Entrectinib, fedratinib, ruxolitinib, zanubrutinib, Dasatinib, Everolimus, ridaforolimus, temsirolimus, Midostaurin |
| Khataniar, A., et al. 2022[3] | S, E, N, M, NSP1, NSP2, NSP3, NSP4, NSP5, NSP6, NSP7, NSP8,                   | Ascorbyl palmitate, cinametic acid, lauric acid, guaifenesin, nabumetone, nafcillin, octacosanol, palmidrol, and salmeterol, Dipyridamole, candesartan cilexetil, candesartan, oxytetracycline, valganciclovir hydrochloride, roxatidine acetate, omeprazole, sulfacetamide, cimetidine, disulfiram, atazanavir, hydroxychloroquine, chloroquine, indinavir montelukast sodium,                                                                |

| Publication               | Target                                                            | Candidate drugs                                                                                                                                                                                                                                                                                                                                                                                                                                                                                                                                                                                                                                                                                                       |
|---------------------------|-------------------------------------------------------------------|-----------------------------------------------------------------------------------------------------------------------------------------------------------------------------------------------------------------------------------------------------------------------------------------------------------------------------------------------------------------------------------------------------------------------------------------------------------------------------------------------------------------------------------------------------------------------------------------------------------------------------------------------------------------------------------------------------------------------|
|                           | NSP9, NSP10, NSP11, NSP12, NSP13, NSP14, NSP15, NSP16, ACE2, RdRp | maribavir, Colchicine, remdesivir, bafilomycin A1, temozolomide, colchicine derivatives, Apamycin, camostat, nafamostat, saracatinib, trametinib, cefuroxime, ceftriaxone, cefotaxime, molnupiravir, grazoprevir, ganciclovir, atazanavir, daclatasvir, acyclovir, etravirine, entecavir, efavirenz, asunaprevir, abacavir, dolutegravir, lomibuvir, penciclovir, trifluridine, danoprevir, ritonavir, saquinavir, raltegravir, lamivudine, Pemirolast, isoniazid pyruvate, nitrofurantoin, and eriodictyol                                                                                                                                                                                                           |
| Islam, T., et al. 2022[4] | S, ACE2, 3CLpro, RdRp, Mpro, Plpro,                               | Remdesivir, Molnupiravir, Paxlovid, Baricitinib                                                                                                                                                                                                                                                                                                                                                                                                                                                                                                                                                                                                                                                                       |
| Wen, W. et al. 2022[5]    | RdRp                                                              | molnupiravir, fluvoxamine and Paxlovid                                                                                                                                                                                                                                                                                                                                                                                                                                                                                                                                                                                                                                                                                |
| McKee, D.L., 2022[6]      | ACE2, 3CLpro, RdRp, TMPRSS2                                       | Camostat mesilate, Nafamostat mesilate, Chloroquine phosphate, Hydroxychloroquine, Remdesivir, Lopinavir/ritonavir, Umifenovir, Favipiravir                                                                                                                                                                                                                                                                                                                                                                                                                                                                                                                                                                           |
| Gysi, D.M. et al. 2021[7] | SIGMAR1, NSP6, CYP3A4, ABCB1, CYP2D6, CYP2C9, HTR2A, ALB          | Ritonavir, Isoniazid, Troleandomycin, Cilostazol, Chloroquine, Rifabutin, Flutamide, Dexamethasone, Rifaximin, Azelastine, Crizotinib, Urea, Methylprednisolone, Dimethyl sulfoxide, Folic acid, Celecoxib, Betamethasone, Prednisolone, Mifepristone, Budesonide, Prednisone, Oxiconazole, Megestrol acetate, Idelalisib, Econazole, Rabeprazole, Quinine, Ticlopidine, Hydrocortisone, Lansoprazole, Methotrexate, Digoxin, Etoposide, Letrozole, Clobetasol, Quercetin, Tioguanine, Medroxyprogesterone acetate, Triamcinolone, Progesterone, Phenylbutyric acid, Colchicine, Teriflunomide, Dimethyl fumarate, Leflunomide, Bortezomid, Citalopram, Cholrambucil, Omeprazole, Ribavirin, Teniposide, Methimazole, |

| Publication                         | Target                                                                             | Candidate drugs                                                                                                                                                                                                                                                                                                                                                                                                                                                                                                                                                                                                             |
|-------------------------------------|------------------------------------------------------------------------------------|-----------------------------------------------------------------------------------------------------------------------------------------------------------------------------------------------------------------------------------------------------------------------------------------------------------------------------------------------------------------------------------------------------------------------------------------------------------------------------------------------------------------------------------------------------------------------------------------------------------------------------|
|                                     |                                                                                    | Cyclophosphamide, Acetic acid, Hydroxychloroquine, Ifosfamide, Aminoglutethimide, Fluconazole, Nelfinavir, Trabectedin, Bicalutamide, Theophylline, Enzalutamide, Gefitinib, Mebendazole, Adenosine, Mesalazine, Nevirapine, Belinostat, Mitomycine, Malathion, Ixekizumab, Vindesine, Secukinumab, Rifapentine, Bilastine, Nirmatrelvir, Clotrimazole, Erlotinib, Panobinostat, Warfarin, Busulfan, Goserelin, Hydroxyurea, Temsirolimus, Abiraterone, Miconazole, Ketorolac, Exemestane, Oxymetholone, Pentamidine, Diclofenac, Aminophylline, Loratadine, Fexofenadine, Terbinafine, Verapamil, Clopidogrel, Rivaroxaban |
| Chakraborty, C., 2021[8]            | 3CLpro, PLPro, RdRp, Mpro, hACE2                                                   | Chloroquine phosphate, Baricitinib, hydroxychloroquine sulfate, Azithromycin, Lopinavir-Ritonavir, Tocilizumab, Favipiravir, Remdesivir, Baricitinib, Ivermectin, Dexamethasone, Baricitinib, Mavrilimumab, Hydroxychloroquine, Remdesivir, Dexamethasone, Tocilizumab, Mavrilimumab                                                                                                                                                                                                                                                                                                                                        |
| Fangzhou Liu_2021[9]                | AKT1, TP53, TNF, IL6, BCL2L1 and ATM                                               | Matrine                                                                                                                                                                                                                                                                                                                                                                                                                                                                                                                                                                                                                     |
| Gurudeeban Selvaraj et al. 2021[10] | MYC, HDAC9, NCOA3, CEBPB, VEGFA, BCL3, SMAD3, SMURF1, KLHL12, CBL, ERBB4, and CRKL | Wortmannin                                                                                                                                                                                                                                                                                                                                                                                                                                                                                                                                                                                                                  |
| Ahmed, S. 2020[11]                  | ORF1ab, N, RdRP, E                                                                 | IFN- $\alpha$ , Lopinavir/ritonavir, Ribavirin, Chloroquine phosphate, Arbidol                                                                                                                                                                                                                                                                                                                                                                                                                                                                                                                                              |
| Muarya, V.K. et al. 2020[12]        | RdRp, 3CLpro, Spike glycoprotein                                                   | Favipiravir, Ribavirin, Penciclovir, Remdesivir, Lopinavir, Ritonavir, Darunavir and cobicistat, ASC09F, Nafamostat, Griffithsin, Arbidol, Oseltamivir, Chloroquine, Nitazoxanide                                                                                                                                                                                                                                                                                                                                                                                                                                           |
| Huang, F. et al., 2020[13]          | spike protein, ACE2,                                                               | Remdesivir/GS-5734, Chloroquine and                                                                                                                                                                                                                                                                                                                                                                                                                                                                                                                                                                                         |

| Publication                               | Target                                                                                                        | Candidate drugs                                                                                                                                                                                                                                                                                                            |
|-------------------------------------------|---------------------------------------------------------------------------------------------------------------|----------------------------------------------------------------------------------------------------------------------------------------------------------------------------------------------------------------------------------------------------------------------------------------------------------------------------|
|                                           | TMPRSS2, 3CLpro, RdRp and PLpro                                                                               | Hydroxychloroquine, Lopinavir/Ritonavir(Kaletra) Favipiravir, EIDD-2801, Baricitinib, Methylprednisolone, Heparin, Zinc, Arbidol/Umifenovir, Darunavir, Oseltamivir, Emtricitabine Tenofovir, Baloxavir marboxil, Danoprevir, Dipyridamole, Fingolimod Losartan, Azithromycin, Ribavirin, Triazavirin, Tranilast, Ebastine |
| EI-Din Abuo-Rahman, G.A., et al. 2020[14] | ACE2, TMPRSS2, ORF1a, ORF1b, Plpro, 3CLpro, RdRp                                                              | Favipiravir, Ribavirin, Penciclovir, Remdesivir (GS-5734), Galidesivir (BCX4430), 6'-Fluorinated-aristeromycin analogues Acyclovir fleximer analogues                                                                                                                                                                      |
| Nitulescu, G.M. et al. 2020[15]           | RdRp, S, PKR, N, M, TLR3, ACE2                                                                                | Tocilizumab, Sarilumab, Siltuximab, Clazakizumab, Anakinra, Canakinumab XPro1595, Adalimumab, IFN- $\alpha$ 2a, Pegylated IFN- $\lambda$ , IFN- $\beta$                                                                                                                                                                    |
| Taz et al. 2020[16]                       | SAA2, MMP9, SAA1, S100A8, ICAM1, PI3, SOD2, C8orf4, SERPINA3, S100A12, S100A9, VEGFA, AKT1, MMP9, ICAM1, CD44 | MIGLITOL CTD 00002031, CHEMBL55802 CTD 00003118, Hesperidin CTD 00006087, Cytochalasin D CTD 00007076, Prolinedithiocarbamate CTD 00002658, Parthenolide CTD 00000087, FEXOFENADINE HYDROCHLORIDE CTD 00003191, Hydroxytyrosol CTD 00000267, Antimycin A CTD 00005427, Anacardic acid C15:3 CTD 00003117,                  |
| Moni et al. 2020[17]                      | MX1, IRF7, BST2, BCL2A1, CSF2, EPSTI1, MMP13, CXCL6, OAS2, CXCL1, CXCL2, CXCL3, IFI6, IFI27 and TNF           | Cytochalasin D, 1'-acetoxychavicol acetate, Atorvastatin, Proline dithiocarbamate, Dicumarol, Oleanolic acid.                                                                                                                                                                                                              |
| Zhen-Zhen[18]                             | ACE2, TMPRSS2, IL-1 $\alpha$ , IL-8, IL-6, and CCL-2, 3CLpro3                                                 | berberine/NIT-X                                                                                                                                                                                                                                                                                                            |
| Yi-Wei Zhu et al. 2020 [19]               | RELA, TNF, IL6, IL1B, MAPK14, TP53, CXCL8, MAPK3, MAPK1, IL4, MAPK8, CASP8, STAT1                             | Quercetin, Kaempferol, bsitosterol, Isorhamnetin, Naringenin, Luteolin, (p)-catechin, Delphinidin, aloe-Emodin, Baicalein and Irisolidone                                                                                                                                                                                  |
| Suresh Kumar _et                          | VEGFA, TNF, IL-6,                                                                                             | Chloroquine, lenalidomide, Penicillin,                                                                                                                                                                                                                                                                                     |

| Publication                 | Target                                                                                                   | Candidate drugs                                                                                                                                                                                                                                                                                                                                                      |
|-----------------------------|----------------------------------------------------------------------------------------------------------|----------------------------------------------------------------------------------------------------------------------------------------------------------------------------------------------------------------------------------------------------------------------------------------------------------------------------------------------------------------------|
| al. 2020 [20]               | CXCL8, IL10, CCL2, IL1B, TLR4, ICAM1, MMP9                                                               | Pentoxifylline, Thalidome, Sorafenib, Paclitaxel, Rapamycin, Cortisol, Statins                                                                                                                                                                                                                                                                                       |
| Zulkar Nain et al. 2020[21] | APC, KPNA2, CTNNB1, CCND1, NFKB1, FOS, HDAC2, PTPRK, LHB, FUS, CTBP1, THRA, CDX2 and BUB1                | Antibiotic K-252A, Cabozantinib, Amuvatinib, Crizotinib, SGX-523, 888719-03-7, ChEMBL527066, <a href="#">ChEMBL503090</a> , SCHEMBL15322421, ChEMBL462712, rac-crizotinib, ChEMBL561660, Crizotinib, Cabozantinib.                                                                                                                                                   |
| Li Zhonglin et al, 2020[22] | DYNLL1, POLR2F, RPL13A, FBXO11, CSNK1E                                                                   | Podophyllotoxin, Amantadine, Thioperamide, Monensin, Vancomycin, Etiocholanolone, Acyclovir, Isoflupredone, Heptaminol, Chenodeoxycholic acid, Podophyllotoxin, Atractyloside, Adiphenine, Monensin, Lisuride                                                                                                                                                        |
| Islam et al. 2020[23]       | BIRC3, ICAM1, IRAK2, MAP3K8, S100A8, SOCS3, STAT5A, TNF, TNFAIP3, TNIP1, FOXC1, GATA2, YY1, FOXL1, NFKB1 | SYK-inhibitor, Radicicol, Dabrafenib, AT-7519, Dasatinib, Lovastatin, Thiostrepton, Linifanib, JNK-IN-5A, Withaferin-A.                                                                                                                                                                                                                                              |
| Ge C et al 2020[24]         | MMP13, NLRP3, TRIM21, GBP1, ADORA2A, PTAFR, TNF, MLNR, IL1B, NFKBIA, ADRB2, and IL6                      | Astragaloside IV                                                                                                                                                                                                                                                                                                                                                     |
| Aishwarya et al. 2020[25]   | MDH1, SGCE, PFKFB3, PGM5, ISLR and ANK2                                                                  | F-1566-0341, Digoxin, Proscillaridin, Linifanib                                                                                                                                                                                                                                                                                                                      |
| Tao et. al., 2020[26]       | MAPK3, MAPK8, TP53, CASP3, IL6, TNF, MAPK1, CCL2, PTGS2                                                  | Quercetin, Kaempferol, Beta-sitosterol, Stigmasterol, Isorhamnetin, Baicalein, Naringenin, Formononetin                                                                                                                                                                                                                                                              |
| Beck et al. [27]            | RdRp, 3CLpro                                                                                             | 5-nonyloxytryptamine, Abacavir sulfate, Abacavir, Acetylcholine Chloride, Acyclovir, Adefovir Dipivoxil, Amprenavir (agenerase), Apixaban, Asunaprevir (BMS-650032), Atazanavir sulfate (BMS-232632-05), Atazanavir, Atropine, avermectin, Batimastat, Boceprevir, bosutinib, Cidofovir, Cyclosporine, dacinostat, Daclatasvir (BMS-790052), danoprevir, Daptomycin, |



| Publication                     | Target                                                                   | Candidate drugs                                                                                                                                                                                                                                                                                                                                                                                                                                                                                                                                                                                                                                                                                                                                                                                                                                                                                                                                                                                                                               |
|---------------------------------|--------------------------------------------------------------------------|-----------------------------------------------------------------------------------------------------------------------------------------------------------------------------------------------------------------------------------------------------------------------------------------------------------------------------------------------------------------------------------------------------------------------------------------------------------------------------------------------------------------------------------------------------------------------------------------------------------------------------------------------------------------------------------------------------------------------------------------------------------------------------------------------------------------------------------------------------------------------------------------------------------------------------------------------------------------------------------------------------------------------------------------------|
|                                 |                                                                          | Darunavir, demecarium, Difloxacin HCl, dinoprostone, efavirenz, elvitegravir, Entecavir Hydrate, entecavir, eprosartan, Etomidate, everolimus, Famciclovir, foxy-5, Ganciclovir, indinavir, ivermectin, Leuprolide Acetate, lisuride, lopinavir, Methscopolamine, mupirocin, naltrindole, Nelfinavir Mesylate, nelfinavir, nevirapine, Octreotide acetate, oligomycin-a, Oseltamivir acid, Oseltamivir phosphate, Oseltamivir, Otilonium Bromide, Penciclovir, Peramivir Trihydrate, Peramivir, Pimecrolimus, prostaglandin, Radotinib(IY-5511), raltegravir, Rapamycin (Sirolimus), Remdesivir, ribavirin, Rifabutin, Rilpivirine, Ritonavir, Rupatadine Fumarate, Saquinavir mesylate, saquinavir, saracatinib, scopolamine, Sildenafil Citrate, sirolimus, somatostatin, Tacrolimus (FK506), Telaprevir (VX-950), temsirolimus, Tenofovir Disoproxil Fumarate, tenofovir, thioestrepton, Tigecycline, Tiotropium Bromide, torin-2, trichostatin-a, Valaciclovir HCl, valaciclovir, Valganciclovir HCl, Zanamivir, zolmitriptan, PHA-665752 |
| Kartikay Prasad et al. 2020[28] | IFIT1, IFITM1, IRF7, ISG15, MX1, and OAS2, TLR3,                         | Mitomycin-C, Imiquimod, Polyinosinic:polycytidylic acid (poly I:C), S-carbamidomethylcysteine(Cysteine-S-acetamide), Vanadium oxide and MgATP.                                                                                                                                                                                                                                                                                                                                                                                                                                                                                                                                                                                                                                                                                                                                                                                                                                                                                                |
| Han et. al, 2020 [29]           | IL6, ACE2, TNF, IL10, MAPK8, MAPK3, CXCL8, CASP3, PTGS2, TP53, and MAPK1 | Quercetin, Luteolin                                                                                                                                                                                                                                                                                                                                                                                                                                                                                                                                                                                                                                                                                                                                                                                                                                                                                                                                                                                                                           |
| S. A. Khan et al., 2021 [30]    | 3CLpro                                                                   | Remdesivir, Saquinavir, Darunavir, flavone, coumarin derivatives                                                                                                                                                                                                                                                                                                                                                                                                                                                                                                                                                                                                                                                                                                                                                                                                                                                                                                                                                                              |
| Alves et al., 2021 [31]         | M <sup>pro</sup>                                                         | Sufugolix, Cenicriviroc, Proglumetacin                                                                                                                                                                                                                                                                                                                                                                                                                                                                                                                                                                                                                                                                                                                                                                                                                                                                                                                                                                                                        |
| Umesh et al., 2021[32]          | M <sup>pro</sup>                                                         | Alpha-ketoamide, Carnoso, Rosmanol, Arjunglucoside-I                                                                                                                                                                                                                                                                                                                                                                                                                                                                                                                                                                                                                                                                                                                                                                                                                                                                                                                                                                                          |
| Liu et al., 2020[33]            | 3CLpro                                                                   | Itacitinib, Oberadilol, Telcagepant,                                                                                                                                                                                                                                                                                                                                                                                                                                                                                                                                                                                                                                                                                                                                                                                                                                                                                                                                                                                                          |

| Publication                        | Target                                           | Candidate drugs                                                                                                                                                                                                                                                                                                                                                                                                                                                              |
|------------------------------------|--------------------------------------------------|------------------------------------------------------------------------------------------------------------------------------------------------------------------------------------------------------------------------------------------------------------------------------------------------------------------------------------------------------------------------------------------------------------------------------------------------------------------------------|
|                                    |                                                  | Vidupiprant, Pilaralisib, Poziotinib, Fostamatinib, CL-275838, Ziprasidone, Leucal/Folinic Acid, ITX5061                                                                                                                                                                                                                                                                                                                                                                     |
| Jin et al., 2020[34]               | M <sup>pro</sup>                                 | Ebselen, Shikonin, Tideglusib, PX-12, TDZD-8, Carmofur                                                                                                                                                                                                                                                                                                                                                                                                                       |
| Feng et al., 2021[35]              | 3CL <sup>Pro</sup>                               | antiviral drugs (lopinavir, tenofovir disoproxil, fosamprenavir and ganciclovir), antiflu drugs (peramivir and zanamivir) and an anti-HCV drug (sofosbuvir)                                                                                                                                                                                                                                                                                                                  |
| Günther et al., 2021[36]           | M <sup>pro</sup>                                 | Adrafinil, AR-42, AT7519, Aurothioglucose, AZD6482, Bromellic acid, Calpeptin, Climbazole, Clonidine, Dexrazoxane, Fusidic acid, Glutathione monoisopropyl ester, Glycine, BE-2254, Ifenprodil, Ipidacrine, Isofloxythepin, LSN2463359, Maleic acid, Neptazane, MUT056399, Necrostatin-1, PD 168568, Pelitinib, Polydatin, RS102895, SEN-1269, Suxamethonium, SUN-B 8155, Tegafur, Evofosfamide, Tofogliflozin, Tolperisone, Tretazicar, Teroxirone, UNC-2327, Zinc pyridine |
| R. J. Khan et al., 2021[37]        | 3CL <sup>pro</sup> , 2'-O-MTase                  | Raltegravir, Paritaprevir, Bictegravir and Dolutegravir                                                                                                                                                                                                                                                                                                                                                                                                                      |
| Raj, 2021[38]                      | NSP-3, 5, 11, 14, 15                             | DB01977, BD07132, DB07535                                                                                                                                                                                                                                                                                                                                                                                                                                                    |
| Kuo et al., 2021[39]               | 3CL <sup>pro</sup> , PL <sup>pro</sup>           | levothyroxine, manidipine-2HCl, levothyroxine, loperamide, manidipine-2HCl, maprotiline, reserpine, proanthocyanidin                                                                                                                                                                                                                                                                                                                                                         |
| Anand et al., 2021[40]             | NSP10, Nucleoprotein, NSP3, 3CL <sup>pro</sup> , | Darifenacin, Nebivolol, Bictegravir, Alvimopan, Irbesartan,                                                                                                                                                                                                                                                                                                                                                                                                                  |
| Cavasotto and Di Filippo, 2021[41] | M <sup>pro</sup> , PL <sup>pro</sup> , S-protein | ENMD-981693, Felypressin, Brilacidin, Samatasvir, Eribaxaban, Aplidin, Candesartan Cilexetil, Ritonavir, Tomivosertib, Rebamipide, Saquinavir, Flovagatran, Sovaprevir, Indinavir, Anatibant, Pilaralisib, Tiracizine, Zabofloxacin, Picotamide, Cilazapril, Indisulam, Darolutamide, Ziprasidone,                                                                                                                                                                           |

| Publication                          | Target                                                   | Candidate drugs                                                                                                                                                                                                                                      |
|--------------------------------------|----------------------------------------------------------|------------------------------------------------------------------------------------------------------------------------------------------------------------------------------------------------------------------------------------------------------|
|                                      |                                                          | Propamidine, Pralatrexate, Carumonam, Acclerasteride, Granotapide                                                                                                                                                                                    |
| Gil et al., 2020[42]                 | RNA polymerase, 3CLpro, PLpro, S                         | remdesivir, favipiravir, ribavirin, oseltamivir, galidesivir, sofosbuvir, umifenovir, lopinavir/ritonavir, ivermectin, disulfiram, griffithsin                                                                                                       |
| Guedes et al., 2021[43]              | PLpro, Mpro, RdRp, N, S                                  | Prazosin, Bazedoxifene, Menaquinone, Posaconazole, Ledipasvir, Imatinib, Atorvastatin, Ivermectin, Elbasvir, Velpatasvir, Pibrentasvir, Ombitasvir, Dactinomycin, Ribavirin, Daclatasvir, Ivermectin, Elbasvir, Fdaxomicin, Atorvastatin, Lomitapide |
| Liang et al., 2021[44]               | RdRp, 3CLpro, PLpro, S                                   | avapritinib, bictegravir, ziprasidone, capmatinib, pexidartinib                                                                                                                                                                                      |
| Rahman et al., 2021[45]              | M <sup>pro</sup> , RdRp, PL <sup>pro</sup> , S           | Rutin                                                                                                                                                                                                                                                |
| Murugan et al., 2020[46]             | 3CLpro, Plpro, RdRp                                      | Baloxavir marboxil, Phthalocyanine, Tadalafil, Lonafarnib, Nilotinib, Dihydroergotamine, R-428                                                                                                                                                       |
| Manikyam and Joshi, 2020[47]         | 3CLpro, Plpro, RdRp                                      | paritaprevir, ritonavir, entecavir and chloroquine                                                                                                                                                                                                   |
| Wu et al., 2020[48]                  | 3CLpro, PLpro, RdRp                                      | ribavirin, valganciclovir, thymidine, cefpiramide, sulfasalazine, phenethicillin, lymecycline, demeclocycline, doxycycline, oxytetracycline, tigecycline, montelukast, fenoterol                                                                     |
| Abdel-Basset et al., 2020[49]        | 3CLpro, RdRp                                             | Cilostazol, Baricitinib, Fluconazole, Itraconazole, Quercetin, Rabeprazole, Grazoprevir, Sirolimus, Ivermectin, Methylprednisolone, Abacavir, Rifaximin, Ritonavir, Metoprolol, Digoxine                                                             |
| Mishra et al., 2021[50]              | S, hACE2, 3CLpro, CTSL, nucleocapsid protein, RdRp, NSP6 | Ritonavir, Dolutegravir, Tenofovir, Tenofovirafenamide, Boceprevir, Catechin, Zanamivir                                                                                                                                                              |
| Nelakuditi and Shrivastava, 2020[51] | Mpro, S, ACE2, RdRp                                      | Vilazodone, Lopinavir, Ritonavir, Darunavir, Selinexor, Etoposide, Nintedanib, Methylprednisolone, Hydrocortisone, Tolcapone, Apixaban, Rivaroxaban, Dabigatran, Betrixaban, Amprenavir                                                              |

| <b>Publication</b>           | <b>Target</b>                                 | <b>Candidate drugs</b>                                                                                                                                                                                                                                                                                                                                                                                                                                                    |
|------------------------------|-----------------------------------------------|---------------------------------------------------------------------------------------------------------------------------------------------------------------------------------------------------------------------------------------------------------------------------------------------------------------------------------------------------------------------------------------------------------------------------------------------------------------------------|
| Mhatre et al., 2021[52]      | 3CLpro, S, PLpro, RdRp, ACE2                  | Favipiravir                                                                                                                                                                                                                                                                                                                                                                                                                                                               |
| Joshi et al., 2020[53]       | SARS-CoV-2 M <sup>Pro</sup> , RdRp and hACE-2 | δ-viniferin, Myricitrin, Taiwanhomoflavone A, Lactucopicrin 15-oxalate, Nympholide-A, Saquinavir, Biorobin, Phyllaemblicin B, (-)-asperlicin, Cassameridin, Chrysanthemin, Scalarane, Baicalin, Hesperidin, Afzelin                                                                                                                                                                                                                                                       |
| Shi et al., 2021[54]         | ACE2, Mpro, RdRp                              | Val-Ser-Gly-Ala-Gly-Arg-Tyr, Val-Met-Asp-Lys-Pro-Gln-Gly, Val-Ile-Glu-Lys-Tyr-Pro, Lys-Asp-Tyr-Arg-Leu, Asp-GluAsn-Ser-Lys-Phe, Asn-Asn-Asn-Pro-Phe-Lys-Phe                                                                                                                                                                                                                                                                                                               |
| Panda et al., 2020[55]       | SARS-CoV-2 Mpro, S, RBD, ACE2                 | Lopinavir, ritonavir, zanamivir, Remdesivir, PC786, JNJ                                                                                                                                                                                                                                                                                                                                                                                                                   |
| Jena et al., 2021[56]        | ACE2, Mpro                                    | Alkaloid 1e, Steroids 3a, Terpenoids 4b, Terpenoids 4n, Octacosanol 5b and Heptacosanol 5c                                                                                                                                                                                                                                                                                                                                                                                |
| Duverger et al., 2021[57]    | ACE-2                                         | Azithromycin, hydroxychloroquine                                                                                                                                                                                                                                                                                                                                                                                                                                          |
| Xiang et al., 2021[58]       | ACE2                                          | puerarin                                                                                                                                                                                                                                                                                                                                                                                                                                                                  |
| de Oliveira et al., 2021[59] | ACE2                                          | Theaflavin digallate, suramin sodium, 5-hydroxytryptophan, solamargine, beta-solamargine, taraxanthin, anthranil acid, evomonoside, dihydroergocristine mesylate, smilacin, withaphysalin, erysimosol, quinupristin, tigogenin, sarsasapogenin, Nilotinib, nilotinib hydrochloride monohydrate, deacetylo-leandrin, dexamethasone-21-sulfobenzoate, dauricinoline, tirilazad, swertifrancheside, digitoxin, Digitoxin, selamectin, acetyldigitoxin, gitaloxin, doramectin |
| Bardaweel et al., 2021[60]   | DPP4, ACE2                                    | sitagliptin                                                                                                                                                                                                                                                                                                                                                                                                                                                               |
| Kabir et al., 2021[61]       | ACE2, TMPRSS2                                 | 10-gingerdione, campesterol, cilastazol, dapagliflozin, danoprevir, dithymoquinone, doxycycline, edoxaban, empaflozin, englitazone, erythromycin, ezetimibe, fluvastatin, fucosterol, glimepiride, gemigliptin, glyburide, methyl prednisolone,                                                                                                                                                                                                                           |

| Publication                       | Target                | Candidate drugs                                                                                                                                                                                                                                                                                                                                                                                                 |
|-----------------------------------|-----------------------|-----------------------------------------------------------------------------------------------------------------------------------------------------------------------------------------------------------------------------------------------------------------------------------------------------------------------------------------------------------------------------------------------------------------|
|                                   |                       | mevastatin, pacritinib, pitavastatin, prasugrel, rosiglitazone, shikonin, tideglusib, ticagrelor and warfarin.                                                                                                                                                                                                                                                                                                  |
| Bojkova et al., 2020[62]          | ACE2, RdRp            | Cycloheximide, 2-deoxy-d-glucose, ribavirin, NMS-873                                                                                                                                                                                                                                                                                                                                                            |
| Aftab et al., 2020[63]            | RdRp, ASP760, ASP761, | CID123624208, CID11687749,                                                                                                                                                                                                                                                                                                                                                                                      |
| Elfiky, 2021[64]                  | RdRp                  | Sofosbuvir, Ribavirin, Galidesivir, Remdesivir, Favipiravir, Cefuroxime, Tenofovir, Hydroxychloroquine, Setrobuvir, YAK, and IDX-184                                                                                                                                                                                                                                                                            |
| Pirzada et al., 2021[65]          | RdRp                  | Remdesivir, Ledipasvir                                                                                                                                                                                                                                                                                                                                                                                          |
| Agrawal et al., 2021[66]          | S, RdRp               | Indinavir, Nelfinavir, Fosamprenavir, Rintatolimod, Loviride, Nevirapine, Nitazoxanide, Imiquimod, Inosine, Cobicistat, Vancomycin, Gliclazide, Azithromycin, Sulfamethoxazole, Meropenem, Tenofovir, Disoproxil, Trimethoprim, Ciprofloxacin, Gentamicin, Levofloxacin, Ivermectin B1a, Ivermectin B1b, Hydroxychloroquine, Beclabuvir, Galidesivir, Ribavirin, Favipiravir, Sofosbuvir, Tenofovir, Remdesivir |
| Ruan et al., 2021[67]             | NSP12-NSP7-NSP8       | Nilotinib, Saquinavir, Tipranavir, Lonafarnib, Tegobuvir, Olysio, Filibuvir, and Cepharanthine                                                                                                                                                                                                                                                                                                                  |
| Y. J. Sun et al., 2021[68]        | TMPRSS2               | avoralstat                                                                                                                                                                                                                                                                                                                                                                                                      |
| Cho et al., 2021[69]              | TMPRSS2               | glycyrrhizin                                                                                                                                                                                                                                                                                                                                                                                                    |
| Gao et al., 2021[70]              | PLpro                 | GRL0617                                                                                                                                                                                                                                                                                                                                                                                                         |
| Zhao et al., 2021[71]             | PLpro                 | YM155, Cryptotanshinone, Tanshinone I, GRL0617                                                                                                                                                                                                                                                                                                                                                                  |
| Weglarz-Tomeczak et al., 2021[72] | PL <sup>pro</sup>     | Ebselen                                                                                                                                                                                                                                                                                                                                                                                                         |
| Sinha et al., 2021[73]            | NSP15, S              | Saikosaponins U and V                                                                                                                                                                                                                                                                                                                                                                                           |
| Yang et al., 2021[74]             | SARS-CoV-2 S protein  | Clemastine, Amiodarone,                                                                                                                                                                                                                                                                                                                                                                                         |

| Publication                     | Target                                                          | Candidate drugs                                                                                   |
|---------------------------------|-----------------------------------------------------------------|---------------------------------------------------------------------------------------------------|
|                                 |                                                                 | Trimeprazine, Bosutinib, Toremifene, Flupenthixol, Azelastine                                     |
| Jeon et al., 2020[75]           | N protein                                                       | niclosamide, ciclesonide                                                                          |
| Kumar et al., 2021[76]          | Noscapines protease                                             | Noscapine                                                                                         |
| C. Liu et al., 2021[77]         | NSP14                                                           | Saquinavir, Hypericin, Baicalein, Bromocriptine                                                   |
| El Hassab et al., 2021[78]      | nsp16                                                           | AP-20, Sinefungin,                                                                                |
| G. Li et al., 2021[79]          | TNF                                                             | Etanercept, Baclofen, adalimumab, tocilizumab, rituximab, glucocorticoids                         |
| F. Sun et al., 2021[80]         | AKT1, AKT2 and AKT3                                             | Capivasertib                                                                                      |
| Dittmar et al., 2021[81]        | Cyclophilin                                                     | Salinomycin, Y-320, AZD8055, Bemcentinib, Dacomitinib, WYE-125132, Ebastine, Dp44mT, Cyclosporine |
| Han et al., 2021[82]            | NFKBIA, IKBKB, CYP450                                           | Sulfasalazine                                                                                     |
| Y. Li et al., 2021[83]          | SRC, HDAC, MEK                                                  | Atorvastatin, Ibuprofen, Ketoconazole                                                             |
| Sauvat et al., 2020[84]         | SARS-CoV-2                                                      | cephararanthine, chloroquine, hydroxychloroquine chloroquine, chlorpromazine, emetine, mefloquine |
| Krafcikova et al., 2020[85]     | 2'-O-RNA methyltransferase (MTase), nsp10-nsp16, RdRp, RNA cap  | Sinefungin                                                                                        |
| Francis Borgio et al., 2020[86] | SARS-CoV-2 helicase,                                            | Vapreotide, atazanavir                                                                            |
| Díaz, 2020[87]                  | orf8, M, Nsp7, orf1b                                            | Rapamycin, FK-506, Bafilomycin A1 Entacapone, Indomethacin, Metformin, Remdesivir                 |
| Gordon et al., 2020[88]         | SIGMAR1                                                         | L-cloperastine, clemastine                                                                        |
| Auwul et al., 2021[89]          | PLK1, AURKB, AURKA, CDK1, CDC20, KIF11, CCNB1, KIF2C, DTL, CDC6 | amsacrine, BRD-K68548958, naproxol, palbociclib, teniposide                                       |
| Belyaeva et al., 2021[90]       | HEK293T, ACAT1, ADK,AGA                                         | Afatinib, axitinib, bosutinib, dasatinib, sorafenib, formoterol, docetaxel                        |
| Lee et al., 2021[91]            | SLC3A2, SLC2A3, FOLR2                                           | fluorodeoxyglucose                                                                                |
| Desvaux et al.,                 | ST2,                                                            | Dexamethasone, Canakinumab, Siltuximab,                                                           |

| Publication                                                                                               | Target                                                                                                                                                                                                                                                                                                                                | Candidate drugs                                                                                                                                                                                                                                                                                                        |
|-----------------------------------------------------------------------------------------------------------|---------------------------------------------------------------------------------------------------------------------------------------------------------------------------------------------------------------------------------------------------------------------------------------------------------------------------------------|------------------------------------------------------------------------------------------------------------------------------------------------------------------------------------------------------------------------------------------------------------------------------------------------------------------------|
| 2021[92]                                                                                                  | RAGE                                                                                                                                                                                                                                                                                                                                  | Sarilumab, Tocilizumab, Infliximab, Adalimumab, Hydrocortisone, Prednisolone, Baricitinib, Ruxolitinib, progesterone, Secukinumab, Eculizumab, Anakinra, Romiplostim                                                                                                                                                   |
| O'Donovan et al., 2021[93]                                                                                | MEK inhibitor                                                                                                                                                                                                                                                                                                                         | Trametinib, Withaferin A, Parthenolide, Lapatinib, Sorafenib, Auranofn, Selumetinib                                                                                                                                                                                                                                    |
| Yee et al., 2021[94]                                                                                      | OATP2B1, OCT1, OCT2, OAT1, OAT3, MATE1, and MATE2                                                                                                                                                                                                                                                                                     | Azithromycin, Baricitinib, Camostat, Chloroquine, Colchicine, Darunavir, Favipiravir, Fingolimod, Hydroxychloroquine, Leflunomide, Lopinavir, Losartan, Oseltamivir, Piclidenoson, Prazosin, Remdesivir, Ribavirin, Ritonavir, Ruxolitinib, Sildenafil, Tetrandrine, Thalidomide, Tofacitinib, Triazavirin, Umifenovir |
| Zhou et al., 2020[95]                                                                                     | ORF1ab, ACE2, JUN, XPO1, NPM1, HNRNPA1                                                                                                                                                                                                                                                                                                | Sirolimus, dactinomycin, mercaptopurine, melatonin, toremifene, emodin                                                                                                                                                                                                                                                 |
| Alam et al., 2021[96]                                                                                     | hsa-miR-1307-3p, hsa-miR-1912-5p, hsa-miR-766-3p, hsa-miR-1910-5p, hsa-miR-1304-5p                                                                                                                                                                                                                                                    | Miravirsen                                                                                                                                                                                                                                                                                                             |
| Alanazi, Farah, and Hor 2022 [97]                                                                         | NSP1, PLpro, Mpro, NSP9, RdRp, NSP13, NSP15, ORF3a, S, E, M, ORF6, ORF7a, N                                                                                                                                                                                                                                                           | Rutin, NADH, Ginsenoside Rg1, protopanaxatriol                                                                                                                                                                                                                                                                         |
| Jose et al. 2022[98]                                                                                      | S                                                                                                                                                                                                                                                                                                                                     | Astragalin, 4-p-Coumaroylquinic Acid, 3-p-Coumaroylquinic Acid, Sinapoyl-D-Glucoside, 1-Sinapoyl-D- Glucose                                                                                                                                                                                                            |
| <b>Nine genes that are common at least 6 articles</b><br>(the rest of them are common at most 5 articles) | <b>ACE2</b> (common in 20 articles), <b>RdRp</b> (common in 30 articles), <b>3CLpro</b> (common in 22 articles), <b>S</b> (common in 18 articles), <b>TMPRSS2</b> (common in 7 articles), <b>Plpro</b> (common in 18 articles), <b>IL6</b> (common in 6 articles), <b>TNF</b> (common in 9 articles), <b>N</b> (common in 6 articles) |                                                                                                                                                                                                                                                                                                                        |

**Table S5:** Binding affinity score of two FDA-Approved drug corresponding to our proposed and published reviewed targets.

| Protein Name                                                     | Molnupiravir | Nirmatrelvir |
|------------------------------------------------------------------|--------------|--------------|
| <b>Proposed Protein</b>                                          |              |              |
| hldD                                                             | -7.8         | -7.1         |
| mlaA                                                             | -6.8         | <b>-7.9</b>  |
| lptD                                                             | <b>-8.1</b>  | -5.7         |
| accB                                                             | -5.3         | -5.7         |
| ftsB                                                             | -5.4         | -6.2         |
| glyQ                                                             | -6.9         | -5.4         |
| lpxC                                                             | -6.3         | -7.2         |
| ppc                                                              | <b>-8.3</b>  | -6.5         |
| ppsA                                                             | -6.8         | -6.6         |
| tamB                                                             | -6.0         | -6.6         |
| <b>Published Protein (taken by reviewing published articles)</b> |              |              |
| 3CLpro                                                           | -6.5         | -6.5         |
| ACE2                                                             | -6.6         | -7.3         |
| IL6                                                              | -5.7         | -6.2         |
| N                                                                | -5.6         | -6.4         |
| PLpro                                                            | -6.6         | -7.4         |
| RdRp                                                             | -7.4         | -7.9         |
| S                                                                | -6.0         | -6.0         |
| TMPRSS2                                                          | -7.2         | -6.9         |
| TNF                                                              | -5.8         | -6.2         |

**Table S6.** Non-bond interactions between top-ordered three receptors and ligand compounds based on their binding affinity.

| PubChem CID | Drug compounds | Receptors/Targets | Binding affinity (kcal/mol) | Interacting Amino Acid                         | Interaction Type                                                           | Distance in Å                             |
|-------------|----------------|-------------------|-----------------------------|------------------------------------------------|----------------------------------------------------------------------------|-------------------------------------------|
| 46215462    | Bemcentinib    | hldD              | -11.8                       | ARG213<br>PHE200<br>HIS186<br>TYR292<br>VAL168 | Pi-Donor Hydrogen<br>Pi-Sigma<br>Pi-Pi T-shaped<br>Pi-Pi T-shaped<br>Alkyl | 3.926<br>3.720<br>5.217<br>5.177<br>5.147 |



| <b>Table S6.</b> Non-bond interactions between top-ordered three receptors and ligand compounds based on their binding affinity. |                       |                          |                                    |                                                                                                  |                                                                                                                                                                                                                                                                    |                                                                                        |
|----------------------------------------------------------------------------------------------------------------------------------|-----------------------|--------------------------|------------------------------------|--------------------------------------------------------------------------------------------------|--------------------------------------------------------------------------------------------------------------------------------------------------------------------------------------------------------------------------------------------------------------------|----------------------------------------------------------------------------------------|
| <b>PubChem CID</b>                                                                                                               | <b>Drug compounds</b> | <b>Receptors/Targets</b> | <b>Binding affinity (kcal/mol)</b> | <b>Interacting Amino Acid</b>                                                                    | <b>Interaction Type</b>                                                                                                                                                                                                                                            | <b>Distance in Å</b>                                                                   |
|                                                                                                                                  |                       |                          |                                    | LYS198                                                                                           | Pi-Alkyl                                                                                                                                                                                                                                                           | 5.334                                                                                  |
| 67505836                                                                                                                         | Ledipasvir            | mlaA                     | -11.7                              | THR152<br>TRP169<br>GLY138<br>PRO135<br>GLY136<br>TYR137<br>LEU180<br>LEU157<br>VAL197           | Conventional Hydrogen<br>Conventional Hydrogen<br>Carbon Hydrogen<br>Carbon Hydrogen<br>Carbon Hydrogen<br>Pi-Pi Stacked<br>Alkyl<br>Alkyl<br>Pi-Alkyl                                                                                                             | 2.067<br>2.602<br>3.658<br>3.582<br>3.464<br>5.728<br>5.314<br>4.616<br>5.163          |
| 67683363                                                                                                                         | Velpatasvir           | lptD                     | -11.4                              | LYS239<br>HIS265<br>THR160<br>PHE161<br>PHE192                                                   | Conventional Hydrogen<br>Conventional Hydrogen<br>Carbon Hydrogen<br>Pi-Pi T-shaped<br>Pi-Pi T-shaped                                                                                                                                                              | 2.727<br>2.333<br>3.482<br>4.768<br>5.135                                              |
| 145996610                                                                                                                        | Molnupiravir          | lptD                     | -8.3                               | LYS234<br>ASN345<br>LYS735<br>GLY753<br>ASN341<br>PHE343<br>GLU733<br>LYS234<br>ASP344<br>ALA751 | Conventional Hydrogen<br>Conventional Hydrogen<br>Conventional Hydrogen<br>Conventional Hydrogen<br>Conventional Hydrogen<br>Conventional Hydrogen<br>Conventional Hydrogen<br>Conventional Hydrogen<br>Conventional Hydrogen<br>Pi-Cation<br>Pi-Anion<br>Pi-Alkyl | 1.935<br>2.112<br>2.725<br>2.800<br>1.947<br>2.886<br>1.919<br>4.117<br>4.920<br>4.871 |
| 155903259                                                                                                                        | Nirmatrelvir          | mlaA                     | -8.1                               | SER139<br>GLU145<br>ASP144<br>ASP148<br>HIS205                                                   | Conventional Hydrogen<br>Conventional Hydrogen<br>Halogen (Fluorine)<br>Halogen (Fluorine)                                                                                                                                                                         | 2.550<br>2.659<br>3.475<br>3.533<br>5.081                                              |

| Table S6. Non-bond interactions between top-ordered three receptors and ligand compounds based on their binding affinity. |                |                   |                             |                       |                  |               |
|---------------------------------------------------------------------------------------------------------------------------|----------------|-------------------|-----------------------------|-----------------------|------------------|---------------|
| PubChem CID                                                                                                               | Drug compounds | Receptors/Targets | Binding affinity (kcal/mol) | Interacting Amio Acid | Interaction Type | Distance in Å |
|                                                                                                                           |                |                   |                             |                       | Pi-Alkyl         |               |

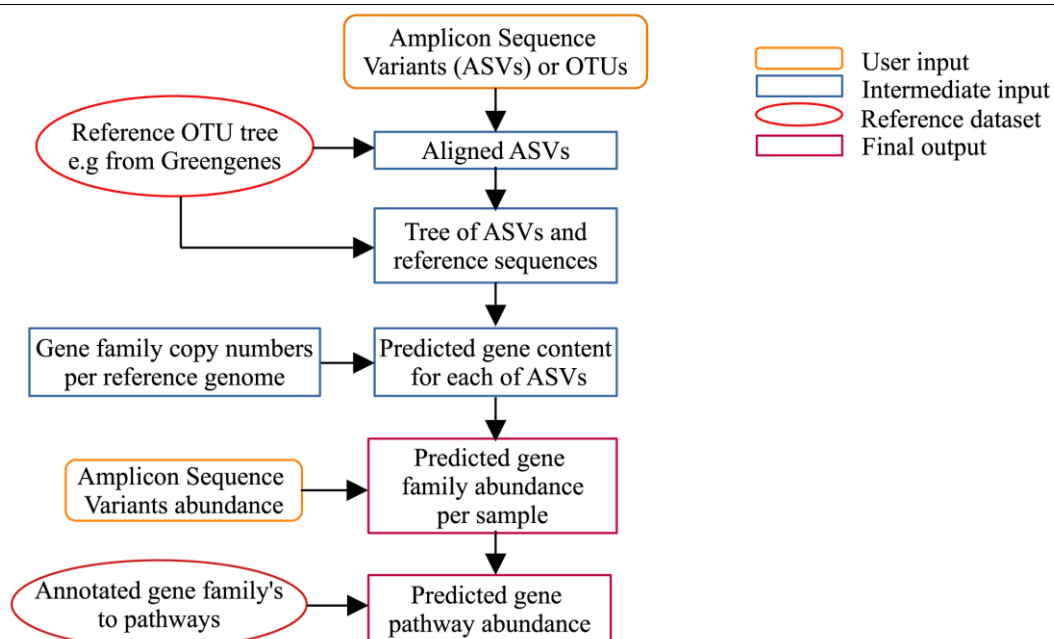

**Figure S1.** A workflow of exploring potential functional genes and their metabolic pathways from differentially abundant bacterial genus between SARS-CoV-2 infection and control samples.

## Reference

1. Rodrigues, L.; Cunha, R.B.; Vassilevskaia, T.; Viveiros, M.; Cunha, C. Drug Repurposing for COVID-19: A Review and a Novel Strategy to Identify New Targets and Potential Drug Candidates. *Molecules* **2022**, *27*, doi:10.3390/molecules27092723.
2. Siminea, N.; Popescu, V.; Martin, J.A.S.; Florea, D.; Gavril, G.; Gheorghe, A.M.; Iţcuş, C.; Kanhaiya, K.; Pacioglu, O.; Popa, L.I.; et al. Network Analytics for Drug Repurposing in COVID-19. *Brief. Bioinform.* **2022**, *23*, doi:10.1093/bib/bbab490.
3. Khataniar, A.; Pathak, U.; Rajkhowa, S.; Jha, A.N. A Comprehensive Review of Drug Repurposing Strategies against Known Drug Targets of COVID-19. *Covid* **2022**, *2*, 148–167, doi:10.3390/covid2020011.
4. Islam, T.; Hasan, M.; Rahman, M.S.; Islam, M.R. Comparative Evaluation of Authorized Drugs for Treating Covid-19 Patients. *Heal. Sci. Reports* **2022**, *5*, doi:10.1002/hsr2.671.
5. Wen, W.; Chen, C.; Tang, J.; Wang, C.; Zhou, M.; Cheng, Y.; Zhou, X.; Wu, Q.; Zhang, X.; Feng, Z.; et al. Efficacy and Safety of Three New Oral Antiviral Treatment (Molnupiravir, Fluvoxamine and Paxlovid) for COVID-19 : a Meta-Analysis. *Ann. Med.* **2022**, *54*, 516–523, doi:10.1080/07853890.2022.2034936.
6. McKee, D.L.; Sternberg, A.; Stange, U.; Laufer, S.; Naujokat, C. Candidate Drugs against SARS-CoV-2 and COVID-19. *Pharmacol. Res.* **2020**, *157*, doi:10.1016/j.phrs.2020.104859.
7. Gysi, D.M.; Do Valle, Í.; Zitnik, M.; Ameli, A.; Gan, X.; Varol, O.; Ghiassian, S.D.; Patten, J.J.; Davey, R.A.; Loscalzo, J.; et al. Network Medicine Framework for Identifying Drug-Repurposing Opportunities for COVID-19. *Proc. Natl. Acad. Sci. U. S. A.* **2021**, *118*, doi:10.1073/pnas.2025581118.
8. Chakraborty, C.; Sharma, A.R.; Bhattacharya, M.; Agoramoorthy, G.; Lee, S.S. The Drug Repurposing for COVID-19 Clinical Trials Provide Very Effective Therapeutic Combinations: Lessons Learned From Major Clinical Studies. *Front. Pharmacol.* **2021**, *12*, doi:10.3389/fphar.2021.704205.
9. Liu, F.; Li, Y.; Yang, Y.; Li, M.; Du, Y.; Zhang, Y.; Wang, J.; Shi, Y. Study on Mechanism of Matrine in Treatment of COVID-19 Combined with Liver Injury by Network Pharmacology and Molecular Docking Technology. *Drug Deliv.* **2021**, *28*, doi:10.1080/10717544.2021.1879313.
10. Selvaraj, G.; Kaliyamurthi, S.; Peslherbe, G.H.; Wei, D.-Q. Identifying Potential Drug Targets and Candidate Drugs for COVID-19: Biological Networks and Structural Modeling Approaches. *F1000Research* **2021**, *10*, 127, doi:10.12688/f1000research.50850.1.
11. Ahmad, S. A Review of COVID-19 (Coronavirus Disease-2019) Diagnosis, Treatments and Prevention. *Eurasian J. Med. Oncol.* **2020**, doi:10.14744/ejmo.2020.90853.
12. Maurya, V.K.; Kumar, S.; Bhatt, M.L.B.; Saxena, S.K. Therapeutic Development and Drugs for the Treatment of COVID-19. **2020**, 109–126, doi:10.1007/978-981-15-4814-7\_10.
13. Huang, F.; Li, Y.; Leung, E.L.H.; Liu, X.; Liu, K.; Wang, Q.; Lan, Y.; Li, X.; Yu, H.; Cui, L.; et al. A Review of Therapeutic Agents and Chinese Herbal Medicines against SARS-CoV-2 (COVID-19). *Pharmacol. Res.* **2020**, *158*, doi:10.1016/j.phrs.2020.104929.
14. El-Din Abuo-Rahma, G.A.; Mohamed, M.F.A.; Ibrahim, T.S.; Shoman, M.E.; Samir, E.; Abd El-Baky, R.M. Potential Repurposed SARS-CoV-2 (COVID-19) Infection Drugs. *RSC Adv.* **2020**, *10*, 26895–26916, doi:10.1039/d0ra05821a.
15. Nitulescu, G.M.; Paunescu, H.; Moschos, S.A.; Petrakis, D.; Nitulescu, G.; Ion, G.N.D.; Spandidos, D.A.; Nikolouzakakis, T.K.; Drakoulis, N.; Tsatsakis, A. Comprehensive Analysis of Drugs to Treat SARS-CoV-2 Infection: Mechanistic Insights into Current COVID-19 Therapies (Review). *Int. J. Mol. Med.* **2020**, *46*, 467–488, doi:10.3892/ijmm.2020.4608.
16. Taz, T.A.; Ahmed, K.; Paul, B.K.; Kawsar, M.; Aktar, N.; Mahmud, S.M.H.; Moni, M.A. Network-Based Identification Genetic Effect of SARS-CoV-2 Infections to Idiopathic Pulmonary Fibrosis

- (IPF) Patients. *Brief. Bioinform.* **2020**, *00*, 1–13, doi:10.1093/bib/bbaa235.
17. Moni, M.A.; Quinn, J.M.W.; Sinmaz, N.; Summers, M.A. Gene Expression Profiling of SARS-CoV-2 Infections Reveal Distinct Primary Lung Cell and Systemic Immune Infection Responses That Identify Pathways Relevant in COVID-19 Disease. *Brief. Bioinform.* **2020**, *00*, 1–14, doi:10.1093/bib/bbaa376.
  18. Wang, Z.Z.; Li, K.; Maskey, A.R.; Huang, W.; Toutov, A.A.; Yang, N.; Srivastava, K.; Geliebter, J.; Tiwari, R.; Miao, M.; et al. A Small Molecule Compound Berberine as an Orally Active Therapeutic Candidate against COVID-19 and SARS: A Computational and Mechanistic Study. *FASEB J.* **2021**, *35*, doi:10.1096/fj.202001792R.
  19. Zhu, Y.W.; Yan, X.F.; Ye, T.J.; Hu, J.; Wang, X.L.; Qiu, F.J.; Liu, C.H.; Hu, X.D. Analyzing the Potential Therapeutic Mechanism of Huashi Baidu Decoction on Severe COVID-19 through Integrating Network Pharmacological Methods. *J. Tradit. Complement. Med.* **2021**, *11*, doi:10.1016/j.jtcme.2021.01.004.
  20. Kumar, S. COVID-19: A Drug Repurposing and Biomarker Identification by Using Comprehensive Gene-Disease Associations through Protein-Protein Interaction Network Analysis. *Preprints* **2020**, doi:10.20944/preprints202003.0440.v1.
  21. Nain, Z.; Rana, H.K.; Liò, P.; Islam, S.M.S.; Summers, M.A.; Moni, M.A. Pathogenetic Profiling of COVID-19 and SARS-like Viruses. *Brief. Bioinform.* **2021**, *22*, doi:10.1093/bib/bbaa173.
  22. Li, Z.; Yang, L. Underlying Mechanisms and Candidate Drugs for COVID-19 Based on the Connectivity Map Database. *Front. Genet.* **2020**, *11*, doi:10.3389/fgene.2020.558557.
  23. Islam, T.; Rahman, M.R.; Aydin, B.; Beklen, H.; Arga, K.Y.; Shahjaman, M. Integrative Transcriptomics Analysis of Lung Epithelial Cells and Identification of Repurposable Drug Candidates for COVID-19. *Eur. J. Pharmacol.* **2020**, *887*, doi:10.1016/j.ejphar.2020.173594.
  24. Ge, C.; He, Y. In Silico Prediction of Molecular Targets of Astragaloside IV for Alleviation of COVID-19 Hyperinflammation by Systems Network Pharmacology and Bioinformatic Gene Expression Analysis. *Front. Pharmacol.* **2020**, *11*, doi:10.3389/fphar.2020.556984.
  25. Aishwarya, S.; Gunasekaran, K.; Margret, A.A. Computational Gene Expression Profiling in the Exploration of Biomarkers, Non-Coding Functional RNAs and Drug Perturbagens for COVID-19. *J. Biomol. Struct. Dyn.* **2020**, *0*, 1–16, doi:10.1080/07391102.2020.1850360.
  26. Tao, Q.; Du, J.; Li, X.; Zeng, J.; Tan, B.; Xu, J.; Lin, W.; Chen, X. In Network Pharmacology and Molecular Docking Analysis on Molecular Targets and Mechanisms of Huashi Baidu Formula in the Treatment of COVID-19. *Drug Dev. Ind. Pharm.* **2020**, *46*, 1–9, doi:10.1080/03639045.2020.1788070.
  27. Beck, B.R.; Shin, B.; Choi, Y.; Park, S.; Kang, K. Predicting Commercially Available Antiviral Drugs That May Act on the Novel Coronavirus (SARS-CoV-2) through a Drug-Target Interaction Deep Learning Model. *Comput. Struct. Biotechnol. J.* **2020**, *18*, doi:10.1016/j.csbj.2020.03.025.
  28. Prasad, K.; Khatoon, F.; Rashid, S.; Ali, N.; AlAsmari, A.F.; Ahmed, M.Z.; Alqahtani, A.S.; Alqahtani, M.S.; Kumar, V. Targeting Hub Genes and Pathways of Innate Immune Response in COVID-19: A Network Biology Perspective. *Int. J. Biol. Macromol.* **2020**, *163*, doi:10.1016/j.ijbiomac.2020.06.228.
  29. Han, L.; Wei, X.X.; Zheng, Y.J.; Zhang, L.L.; Wang, X.M.; Yang, H.Y.; Ma, X.; Zhao, L.H.; Tong, X.L. Potential Mechanism Prediction of Cold-Damp Plague Formula against COVID-19 via Network Pharmacology Analysis and Molecular Docking. *Chinese Med. (United Kingdom)* **2020**, *15*, doi:10.1186/s13020-020-00360-8.
  30. Khan, S.A.; Zia, K.; Ashraf, S.; Uddin, R.; Ul-Haq, Z. Identification of Chymotrypsin-like Protease Inhibitors of SARS-CoV-2 via Integrated Computational Approach. *J. Biomol. Struct. Dyn.* **2021**, *39*, 2607–2616, doi:10.1080/07391102.2020.1751298.
  31. Alves, V.M.; Bobrowski, T.; Melo-Filho, C.C.; Korn, D.; Auerbach, S.; Schmitt, C.; Muratov, E.N.;

- Tropsha, A. QSAR Modeling of SARS-CoV Mpro Inhibitors Identifies Sufugolix, Cenicriviroc, Proglumetacin, and Other Drugs as Candidates for Repurposing against SARS-CoV-2. *Mol. Inform.* **2021**, *40*, doi:10.1002/minf.202000113.
32. Umesh; Kundu, D.; Selvaraj, C.; Singh, S.K.; Dubey, V.K. Identification of New Anti-NCoV Drug Chemical Compounds from Indian Spices Exploiting SARS-CoV-2 Main Protease as Target. *J. Biomol. Struct. Dyn.* **2021**, *39*, 3428–3434, doi:10.1080/07391102.2020.1763202.
  33. Liu, S.; Zheng, Q.; Wang, Z. Potential Covalent Drugs Targeting the Main Protease of the SARS-CoV-2 Coronavirus. *Bioinformatics* **2020**, *36*, doi:10.1093/bioinformatics/btaa224.
  34. Jin, Z.; Du, X.; Xu, Y.; Deng, Y.; Liu, M.; Zhao, Y.; Zhang, B.; Li, X.; Zhang, L.; Peng, C.; et al. Structure of Mpro from SARS-CoV-2 and Discovery of Its Inhibitors. *Nature* **2020**, *582*, 289–293, doi:10.1038/s41586-020-2223-y.
  35. Feng, Z.; Chen, M.; Xue, Y.; Liang, T.; Chen, H.; Zhou, Y.; Nolin, T.D.; Smith, R.B.; Xie, X.Q. MCCS: A Novel Recognition Pattern-Based Method for Fast Track Discovery of Anti-SARS-CoV-2 Drugs. *Brief. Bioinform.* **2021**, *22*, 946–962, doi:10.1093/bib/bbaa260.
  36. Günther, S.; Reinke, P.Y.A.; Fernández-García, Y.; Lieske, J.; Lane, T.J.; Ginn, H.M.; Koua, F.H.M.; Ehrt, C.; Ewert, W.; Oberthuer, D.; et al. X-Ray Screening Identifies Active Site and Allosteric Inhibitors of SARS-CoV-2 Main Protease. *Science (80-. ).* **2021**, *372*, doi:10.1126/science.abf7945.
  37. Khan, R.J.; Jha, R.K.; Amera, G.M.; Jain, M.; Singh, E.; Pathak, A.; Singh, R.P.; Muthukumar, J.; Singh, A.K. Targeting SARS-CoV-2: A Systematic Drug Repurposing Approach to Identify Promising Inhibitors against 3C-like Proteinase and 2'-O-Ribose Methyltransferase. *J. Biomol. Struct. Dyn.* **2021**, *39*, 2679–2692, doi:10.1080/07391102.2020.1753577.
  38. Raj, R. Analysis of Non-Structural Proteins, NSPs of SARS-CoV-2 as Targets for Computational Drug Designing. *Biochem. Biophys. Reports* **2021**, *25*, 100847, doi:10.1016/j.bbrep.2020.100847.
  39. Kuo, C.J.; Chao, T.L.; Kao, H.C.; Tsai, Y.M.; Liu, Y.K.; Wang, L.H.C.; Hsieh, M.C.; Chang, S.Y.; Liang, P.H. Kinetic Characterization and Inhibitor Screening for the Proteases Leading to Identification of Drugs against SARS-CoV-2. *Antimicrob. Agents Chemother.* **2021**, *65*, doi:10.1128/AAC.02577-20.
  40. Anand, N.M.; Liya, D.H.; Pradhan, A.K.; Tayal, N.; Bansal, A.; Donakonda, S.; Jainarayanan, A.K. A Comprehensive SARS-CoV-2 Genomic Analysis Identifies Potential Targets for Drug Repurposing. *PLoS One* **2021**, *16*, doi:10.1371/journal.pone.0248553.
  41. Cavasotto, C.N.; Di Filippo, J.I. In Silico Drug Repurposing for COVID-19: Targeting SARS-CoV-2 Proteins through Docking and Consensus Ranking. *Mol. Inform.* **2021**, *40*, 1–8, doi:10.1002/minf.202000115.
  42. Gil, C.; Ginex, T.; Maestro, I.; Nozal, V.; Barrado-Gil, L.; Cuesta-Geijo, M.Á.; Urquiza, J.; Ramírez, D.; Alonso, C.; Campillo, N.E.; et al. COVID-19: Drug Targets and Potential Treatments. *J. Med. Chem.* **2020**, *63*, 12359–12386, doi:10.1021/acs.jmedchem.0c00606.
  43. Guedes, I.A.; Costa, L.S.C.; dos Santos, K.B.; Karl, A.L.M.; Rocha, G.K.; Teixeira, I.M.; Galheigo, M.M.; Medeiros, V.; Krempser, E.; Custódio, F.L.; et al. Drug Design and Repurposing with DockThor-VS Web Server Focusing on SARS-CoV-2 Therapeutic Targets and Their Non-Synonym Variants. *Sci. Rep.* **2021**, *11*, 1–20, doi:10.1038/s41598-021-84700-0.
  44. Liang, H.; Zhao, L.; Gong, X.; Hu, M.; Wang, H. Virtual Screening FDA Approved Drugs against Multiple Targets of SARS-CoV-2. *Clin. Transl. Sci.* **2021**, *14*, 1123–1132, doi:10.1111/cts.13007.
  45. Rahman, F.; Tabrez, S.; Ali, R.; Alqahtani, A.S.; Ahmed, M.Z.; Rub, A. Molecular Docking Analysis of Rutin Reveals Possible Inhibition of SARS-CoV-2 Vital Proteins. *J. Tradit. Complement. Med.* **2021**, *11*, 173–179, doi:10.1016/j.jtcme.2021.01.006.
  46. Murugan, N.A.; Kumar, S.; Jeyakanthan, J.; Srivastava, V. Searching for Target-Specific and

- Multi-Targeting Organics for Covid-19 in the Drugbank Database with a Double Scoring Approach. *Sci. Rep.* **2020**, *10*, doi:10.1038/s41598-020-75762-7.
47. Manikyam, H.K.; Joshi, S.K. Whole Genome Analysis and Targeted Drug Discovery Using Computational Methods and High Throughput Screening Tools for Emerged Novel Coronavirus (2019-NCoV). *J. Pharm. drug Res.* **2020**, *3*, 341–361.
  48. Wu, C.; Liu, Y.; Yang, Y.; Zhang, P.; Zhong, W.; Wang, Y.; Wang, Q.; Xu, Y.; Li, M.; Li, X.; et al. Analysis of Therapeutic Targets for SARS-CoV-2 and Discovery of Potential Drugs by Computational Methods. *Acta Pharm. Sin. B* **2020**, *10*, 766–788, doi:10.1016/j.apsb.2020.02.008.
  49. Abdel-Basset, M.; Hawash, H.; Elhoseny, M.; Chakraborty, R.K.; Ryan, M. DeepDTA: Deep Learning for Predicting Drug-Target Interactions: A Case Study of Covid-19 Drug Repurposing. *IEEE Access* **2020**, *8*, 170433–170451, doi:10.1109/ACCESS.2020.3024238.
  50. Mishra, C.B.; Pandey, P.; Sharma, R.D.; Malik, M.Z.; Mongre, R.K.; Lynn, A.M.; Prasad, R.; Jeon, R.; Prakash, A. Identifying the Natural Polyphenol Catechin as a Multi-Targeted Agent against SARS-CoV-2 for the Plausible Therapy of COVID-19: An Integrated Computational Approach. *Brief. Bioinform.* **2021**, *22*, 1346–1360, doi:10.1093/bib/bbaa378.
  51. Nelakuditi, B.; Shrivastava, A. Drug Repurposing 57 Well-Known Drugs for Three COVID-19 Targets : Mpro , Spike , RdRp. *Biol. Med. Chem.* **2020**, doi:10.33774/chemrxiv-2021-smfn8.
  52. Mhatre, S.; Naik, S.; Patravale, V. A Molecular Docking Study of EGCG and Theaflavin Digallate with the Druggable Targets of SARS-CoV-2. *Comput. Biol. Med.* **2021**, *129*, doi:10.1016/j.combiomed.2020.104137.
  53. Joshi, R.S.; Jagdale, S.S.; Bansode, S.B.; Shankar, S.S.; Tellis, M.B.; Pandya, V.K.; Chugh, A.; Giri, A.P.; Kulkarni, M.J. Discovery of Potential Multi-Target-Directed Ligands by Targeting Host-Specific SARS-CoV-2 Structurally Conserved Main Protease. *J. Biomol. Struct. Dyn.* **2020**, *39*, 1–16, doi:10.1080/07391102.2020.1760137.
  54. Shi, A.M.; Guo, R.; Wang, Q.; Zhou, J.R. Screening and Molecular Modeling Evaluation of Food Peptides to Inhibit Key Targets of Covid-19 Virus. *Biomolecules* **2021**, *11*, doi:10.3390/biom11020330.
  55. Panda, P.K.; Arul, M.N.; Patel, P.; Verma, S.K.; Luo, W.; Rubahn, H.G.; Mishra, Y.K.; Suar, M.; Ahuja, R. Structure-Based Drug Designing and Immunoinformatics Approach for SARS-CoV-2. *Sci. Adv.* **2020**, *6*, 1–15, doi:10.1126/sciadv.abb8097.
  56. Jena, S.; Munusami, P.; Mm, B.; Chanda, K. Computationally Approached Inhibition Potential of Tinospora Cordifolia towards COVID-19 Targets. *VirusDisease* **2021**, *32*, doi:10.1007/s13337-021-00666-7.
  57. Duverger, E.; Herlem, G.; Picaud, F. A Potential Solution to Avoid Overdose of Mixed Drugs in the Event of Covid-19: Nanomedicine at the Heart of the Covid-19 Pandemic. *J. Mol. Graph. Model.* **2021**, *104*, doi:10.1016/j.jmgm.2021.107834.
  58. He, Xiang, JUNYI WANG, Lei Zhang, Qin Ran, Anying Xiong, Shengbin Liu, Dehong Wu, Bin Niu, Ying Xiong, and G.L. Virtual Screening of Potential AEC2 Inhibitors for COVID-19 from Traditional Chinese Medicine. **2021**, doi:https://doi.org/10.21203/rs.3.rs-145338/v1.
  59. de Oliveira, O.V.; Rocha, G.B.; Paluch, A.S.; Costa, L.T. Repurposing Approved Drugs as Inhibitors of SARS-CoV-2 S-Protein from Molecular Modeling and Virtual Screening. *J. Biomol. Struct. Dyn.* **2021**, *39*, doi:10.1080/07391102.2020.1772885.
  60. Bardaweel, S.K.; Hajjo, R.; Sabbah, D.A. Sitagliptin: A Potential Drug for the Treatment of COVID-19? *Acta Pharm.* **2021**, *71*, 175–184, doi:10.2478/acph-2021-0013.
  61. Kabir, E.R.; Mustafa, N.; Nausheen, N.; Sharif Siam, M.K.; Syed, E.U. Exploring Existing Drugs: Proposing Potential Compounds in the Treatment of COVID-19. *Heliyon* **2021**, *7*, doi:10.1016/j.heliyon.2021.e06284.
  62. Bojkova, D.; Klann, K.; Koch, B.; Wiedera, M.; Krause, D.; Ciesek, S.; Cinatl, J.; Münch, C.

- Proteomics of SARS-CoV-2-Infected Host Cells Reveals Therapy Targets. *Nature* **2020**, *583*, 469–472, doi:10.1038/s41586-020-2332-7.
63. Aftab, S.O.; Ghouri, M.Z.; Masood, M.U.; Haider, Z.; Khan, Z.; Ahmad, A.; Munawar, N. Analysis of SARS-CoV-2 RNA-Dependent RNA Polymerase as a Potential Therapeutic Drug Target Using a Computational Approach. *J. Transl. Med.* **2020**, *18*, 1–15, doi:10.1186/s12967-020-02439-0.
  64. Elfiky, A.A. SARS-CoV-2 RNA Dependent RNA Polymerase (RdRp) Targeting: An in Silico Perspective. *J. Biomol. Struct. Dyn.* **2021**, *39*, 3204–3212, doi:10.1080/07391102.2020.1761882.
  65. Pirzada, R.H.; Haseeb, M.; Batool, M.; Kim, M.S.; Choi, S. Remdesivir and Ledipasvir among the FDA-Approved Antiviral Drugs Have Potential to Inhibit SARS-CoV-2 Replication. *Cells* **2021**, *10*, doi:10.3390/cells10051052.
  66. Agrawal, L.; Poullikkas, T.; Eisenhower, S.; Monsanto, C.; Bakku, R.K.; Chen, M.-H.; Kalra, R.S. Viroinformatics-Based Analysis of SARS-CoV-2 Core Proteins for Potential Therapeutic Targets. *Antibodies* **2021**, *10*, 3, doi:10.3390/antib10010003.
  67. Ruan, Z.; Liu, C.; Guo, Y.; He, Z.; Huang, X.; Jia, X.; Yang, T. SARS-CoV-2 and SARS-CoV: Virtual Screening of Potential Inhibitors Targeting RNA-Dependent RNA Polymerase Activity (NSP12). *J. Med. Virol.* **2021**, *93*, 389–400, doi:10.1002/jmv.26222.
  68. Sun, Y.J.; Velez, G.; Parsons, D.E.; Li, K.; Ortiz, M.E.; Sharma, S.; McCray, P.B.; Bassuk, A.G.; Mahajan, V.B. Structure-Based Phylogeny Identifies Avoralstat as a TMPRSS2 Inhibitor That Prevents SARS-CoV-2 Infection in Mice. *J. Clin. Invest.* **2021**, *131*, doi:10.1172/JCI147973.
  69. Cho, T.; Han, H.S.; Jeong, J.; Park, E.M.; Shim, K.S. A Novel Computational Approach for the Discovery of Drug Delivery System Candidates for Covid-19. *Int. J. Mol. Sci.* **2021**, *22*, 1–20, doi:10.3390/ijms22062815.
  70. Gao, X.; Qin, B.; Chen, P.; Zhu, K.; Hou, P.; Wojdyla, J.A.; Wang, M.; Cui, S. Crystal Structure of SARS-CoV-2 Papain-like Protease. *Acta Pharm. Sin. B* **2021**, *11*, 237–245, doi:10.1016/j.apsb.2020.08.014.
  71. Zhao, Y.; Du, X.; Duan, Y.; Pan, X.; Sun, Y.; You, T.; Han, L.; Jin, Z.; Shang, W.; Yu, J.; et al. High-Throughput Screening Identifies Established Drugs as SARS-CoV-2 PLpro Inhibitors. *Protein Cell* **2021**, doi:10.1007/s13238-021-00836-9.
  72. Weglarz-Tomczak, E.; Tomczak, J.M.; Talma, M.; Burda-Grabowska, M.; Giurg, M.; Brul, S. Identification of Ebselen and Its Analogues as Potent Covalent Inhibitors of Papain-like Protease from SARS-CoV-2. *Sci. Rep.* **2021**, *11*, 1–10, doi:10.1038/s41598-021-83229-6.
  73. Sinha, S.K.; Shakya, A.; Prasad, S.K.; Singh, S.; Gurav, N.S.; Prasad, R.S.; Gurav, S.S. An In-Silico Evaluation of Different Saikosaponins for Their Potency against SARS-CoV-2 Using NSP15 and Fusion Spike Glycoprotein as Targets. *J. Biomol. Struct. Dyn.* **2021**, *39*, 3244–3255, doi:10.1080/07391102.2020.1762741.
  74. Yang, L.; Pei, R. Juan; Li, H.; Ma, X. na; Zhou, Y.; Zhu, F. hua; He, P. lan; Tang, W.; Zhang, Y. cheng; Xiong, J.; et al. Identification of SARS-CoV-2 Entry Inhibitors among Already Approved Drugs. *Acta Pharmacol. Sin.* **2021**, *42*, 1347–1353, doi:10.1038/s41401-020-00556-6.
  75. Jeon, S.; Ko, M.; Lee, J.; Choi, I.; Byun, S.Y.; Park, S.; Shum, D.; Kim, S. Identification of Antiviral Drug Candidates against SARS-CoV-2 from FDA-Approved Drugs. *Antimicrob. Agents Chemother.* **2020**, *64*, 1–9, doi:10.1128/AAC.00819-20.
  76. Kumar, D.; Kumari, K.; Jayaraj, A.; Kumar, V.; Kumar, R.V.; Dass, S.K.; Chandra, R.; Singh, P. Understanding the Binding Affinity of Noscipines with Protease of SARS-CoV-2 for COVID-19 Using MD Simulations at Different Temperatures. *J. Biomol. Struct. Dyn.* **2021**, *39*, 2659–2672, doi:10.1080/07391102.2020.1752310.
  77. Liu, C.; Zhu, X.; Lu, Y.; Zhang, X.; Jia, X.; Yang, T. Potential Treatment with Chinese and Western Medicine Targeting NSP14 of SARS-CoV-2. *J. Pharm. Anal.* **2021**, *11*, 272–277,

- doi:10.1016/j.jpha.2020.08.002.
78. El Hassab, M.A.; Ibrahim, T.M.; Shoun, A.A.; Al-Rashood, S.T.; Alkahtani, H.M.; Alharbi, A.; Eskandrani, R.O.; Eldehna, W.M. In Silico Identification of Potential SARS COV-2 2'- O - Methyltransferase Inhibitor: Fragment-Based Screening Approach and MM-PBSA Calculations. *RSC Adv.* **2021**, *11*, 16026–16033, doi:10.1039/d1ra01809d.
  79. Li, G.; Ruan, S.; Zhao, X.; Liu, Q.; Dou, Y.; Mao, F. Transcriptomic Signatures and Repurposing Drugs for COVID-19 Patients: Findings of Bioinformatics Analyses. *Comput. Struct. Biotechnol. J.* **2021**, *19*, doi:10.1016/j.csbj.2020.11.056.
  80. Sun, F.; Mu, C.; Kwok, H.F.; Xu, J.; Wu, Y.; Liu, W.; Sabatier, J.-M.; Annweiler, C.; Li, X.; Cao, Z.; et al. Capivasertib Restricts SARS-CoV-2 Cellular Entry: A Potential Clinical Application for COVID-19. *Int. J. Biol. Sci.* **2021**, *17*, 2348–2355, doi:10.7150/ijbs.57810.
  81. Dittmar, M.; Lee, J.S.; Whig, K.; Segrist, E.; Li, M.; Kamalia, B.; Castellana, L.; Ayyanathan, K.; Cardenas-Diaz, F.L.; Morrissey, E.E.; et al. Drug Repurposing Screens Reveal Cell-Type-Specific Entry Pathways and FDA-Approved Drugs Active against SARS-Cov-2. *Cell Rep.* **2021**, *35*, 108959, doi:10.1016/j.celrep.2021.108959.
  82. Han, N.; Hwang, W.; Tzelepis, K.; Schmerer, P.; Yankova, E.; MacMahon, M.; Lei, W.; Katritsis, N.M.; Liu, A.; Felgenhauer, U.; et al. Identification of SARS-CoV-2-Induced Pathways Reveals Drug Repurposing Strategies. *Sci. Adv.* **2021**, *7*, 1–15, doi:10.1126/sciadv.abh3032.
  83. Li, Y.; Duche, A.; Sayer, M.R.; Roosan, D.; Khalafalla, F.G.; Ostrom, R.S.; Totonchy, J.; Roosan, M.R. SARS-CoV-2 Early Infection Signature Identified Potential Key Infection Mechanisms and Drug Targets. *BMC Genomics* **2021**, *22*, 1–13, doi:10.1186/s12864-021-07433-4.
  84. Sauvat, A.; Ciccocanti, F.; Colavita, F.; Di Rienzo, M.; Castilletti, C.; Capobianchi, M.R.; Kepp, O.; Zitvogel, L.; Fimia, G.M.; Piacentini, M.; et al. On-Target versus off-Target Effects of Drugs Inhibiting the Replication of SARS-CoV-2. *Cell Death Dis.* **2020**, *11*, doi:10.1038/s41419-020-02842-x.
  85. Krafcikova, P.; Silhan, J.; Nencka, R.; Boura, E. Structural Analysis of the SARS-CoV-2 Methyltransferase Complex Involved in RNA Cap Creation Bound to Sinefungin. *Nat. Commun.* **2020**, *11*, 1–7, doi:10.1038/s41467-020-17495-9.
  86. Francis Borgio, J.; Alsuwat, H.S.; Al Otaibi, W.M.; Ibrahim, A.M.; Almandil, N.B.; Al Asoom, L.I.; Salahuddin, M.; Kamaraj, B.; AbdulAzeez, S. State-of-the-Art Tools Unveil Potent Drug Targets amongst Clinically Approved Drugs to Inhibit Helicase in SARS-CoV-2. *Arch. Med. Sci.* **2020**, *16*, 508–518, doi:10.5114/aoms.2020.94567.
  87. Díaz, J. SARS-CoV-2 Molecular Network Structure. *Front. Physiol.* **2020**, *11*, 1–8, doi:10.3389/fphys.2020.00870.
  88. Gordon, D.E.; Jang, G.M.; Bouhaddou, M.; Xu, J.; Obernier, K.; White, K.M.; O'Meara, M.J.; Rezeli, V. V.; Guo, J.Z.; Swaney, D.L.; et al. A SARS-CoV-2 Protein Interaction Map Reveals Targets for Drug Repurposing. *Nature* **2020**, *583*, doi:10.1038/s41586-020-2286-9.
  89. Auwal, M.R.; Rahman, M.R.; Gov, E.; Shahjaman, M.; Moni, M.A. Bioinformatics and Machine Learning Approach Identifies Potential Drug Targets and Pathways in COVID-19. *Brief. Bioinform.* **2021**, doi:10.1093/bib/bbab120.
  90. Belyaeva, A.; Cammarata, L.; Radhakrishnan, A.; Squires, C.; Yang, K.D.; Shivashankar, G. V.; Uhler, C. Causal Network Models of SARS-CoV-2 Expression and Aging to Identify Candidates for Drug Repurposing. *Nat. Commun.* **2021**, *12*, doi:10.1038/s41467-021-21056-z.
  91. Lee, H.; Park, J.; Im, H.J.; Na, K.J.; Choi, H. Discovery of Potential Imaging and Therapeutic Targets for Severe Inflammation in COVID-19 Patients. *Sci. Rep.* **2021**, *11*, doi:10.1038/s41598-021-93743-2.
  92. Desvaux, E.; Hamon, A.; Hubert, S.; Boudjeniba, C.; Chassagnol, B.; Swindle, J.; Aussy, A.; Laigle, L.; Laplume, J.; Soret, P.; et al. Network-Based Repurposing Identifies Anti- Alarmins as Drug Candidates to Control Severe Lung Inflammation in COVID-19. *PLoS One* **2021**, *16*,



- doi:10.1371/journal.pone.0254374.
93. O'Donovan, S.M.; Imami, A.; Eby, H.; Henkel, N.D.; Creeden, J.F.; Asah, S.; Zhang, X.; Wu, X.; Alnafisah, R.; Taylor, R.T.; et al. Identification of Candidate Repurposable Drugs to Combat COVID-19 Using a Signature-Based Approach. *Sci. Rep.* **2021**, *11*, doi:10.1038/s41598-021-84044-9.
  94. Yee, S.W.; Vora, B.; Oskotsky, T.; Zou, L.; Jakobsen, S.; Enogieru, O.J.; Koleske, M.L.; Kost, I.; Rödin, M.; Sirota, M.; et al. Drugs in COVID-19 Clinical Trials: Predicting Transporter-Mediated Drug-Drug Interactions Using In Vitro Assays and Real-World Data. *Clin. Pharmacol. Ther.* **2021**, *110*, doi:10.1002/cpt.2236.
  95. Zhou, Y.; Hou, Y.; Shen, J.; Huang, Y.; Martin, W.; Cheng, F. Network-Based Drug Repurposing for Novel Coronavirus 2019-NCoV/SARS-CoV-2. *Cell Discov.* **2020**, *6*, doi:10.1038/s41421-020-0153-3.
  96. Alam, T.; Lipovich, L. Mircovid-19: Potential Targets of Human Mirnas in Sars-Cov-2 for Rna-Based Drug Discovery. *Non-coding RNA* **2021**, *7*, doi:10.3390/NCRNA7010018.
  97. Alanazi, K.M.; Farah, M.A.; Hor, Y.Y. Multi-Targeted Approaches and Drug Repurposing Reveal Possible SARS-CoV-2 Inhibitors. *Vaccines* **2022**, *10*, doi:10.3390/vaccines10010024.
  98. Jose, S.; Gupta, M.; Sharma, U.; Quintero-Saumeth, J.; Dwivedi, M. Potential of Phytocompounds from Brassica Oleracea Targeting S2-Domain of SARS-CoV-2 Spike Glycoproteins: Structural and Molecular Insights. *J. Mol. Struct.* **2022**, *1254*, doi:10.1016/j.molstruc.2022.132369.
